# Supplementary figures and images for: Mechanochemical approach to synthesize citric acid-soluble fertilizer of dittmarite (NH4MgPO4·H2O) from talc/NH4H2PO4 mixture
Source: Royal Society of Chemistry journal article supplement (doi:10.1039/d0ra00387e), 2020-01-01

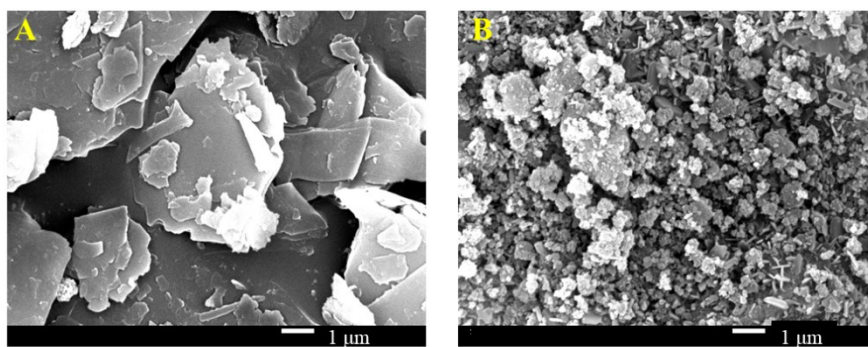

**Fig. S-1** SEM images of the raw talc and the D-600 sample

Supplement: d0ra00387e1.pdf [file d0ra00387e1.pdf]
